# Supplementary material
Source: MDPI journal article supplement (https://www.mdpi.com/2072-666X/6/4/462)
Supplement: s1 [file s1]

## Supplementary Information

**Table S1.** Effect of pH of phosphate buffer and NaCl/GSH concentrations on assay performance.

| $\Delta A_{610}/A_{520}$ | 0/3   | 0/3.33   | 0/3.66 | 0/4     | 0/4.33  | 1/3.33   |
|--------------------------|-------|----------|--------|---------|---------|----------|
| pH 6                     | NT ** | ND *     | NT **  | NT **   | NT **   | NT **    |
| pH 7                     | ND *  | 0.011636 | ND *   | 0.02768 | 0.02773 | 0.001634 |

Notes: \* ND: Color change was not detectable or too fast to allow spectrometric measurement; \*\* NT: Not tested.

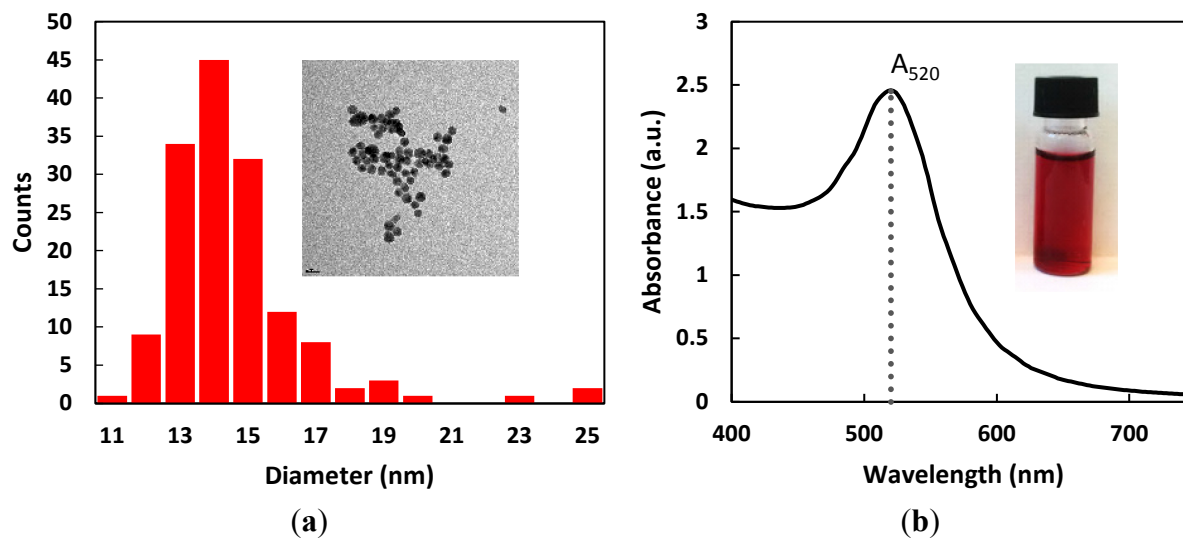

**Figure S1.** Characteristics of the AuNP aqueous solution: (a) size distribution and TEM image; and (b) characteristic absorbance peak at 520 nm of the solution, showing ruby-red colour.

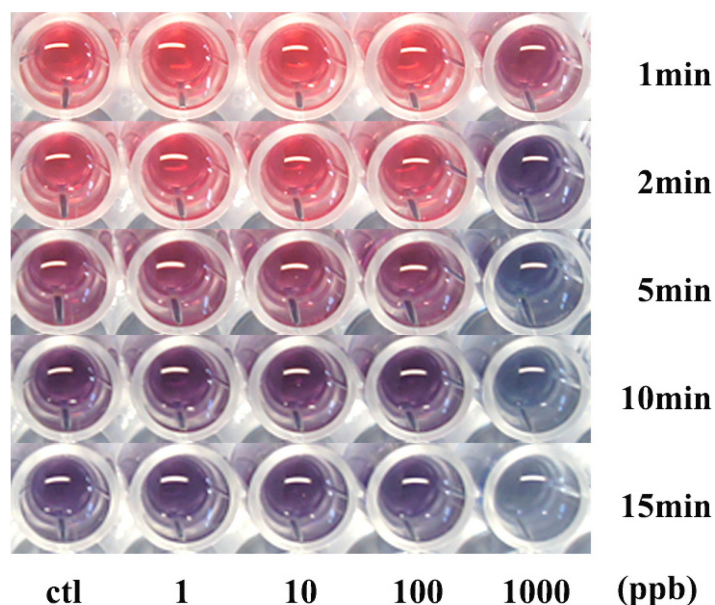

**Figure S2.** The color changes of the AuNP sensors upon the addition of various amount of Pb<sup>II</sup> standard solution with respect to the time. The Pb<sup>II</sup> concentrations in the figure were final concentrations in the assay solutions.

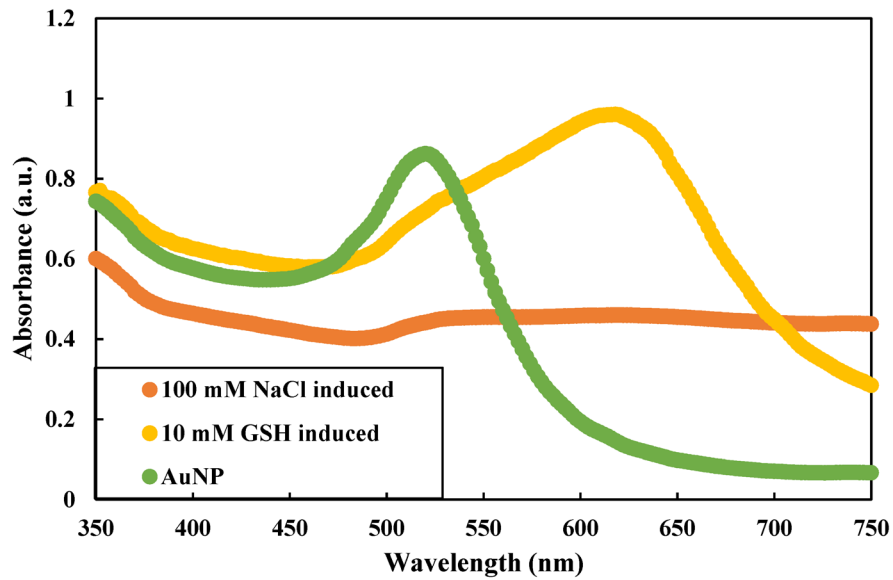

**Figure S3.** Spectrum of NaCl and GSH induced aggregation of AuNP solutions versus AuNP solution without a background electrolyte.

© 2015 by the authors; licensee MDPI, Basel, Switzerland. This article is an open access article distributed under the terms and conditions of the Creative Commons Attribution license (<http://creativecommons.org/licenses/by/4.0/>).
